# Supplementary material for: Effect of hydrothermal aging temperature on a Cu-SSZ-13/H-SAPO-34 composite for the selective catalytic reduction of NOxby NH3
Source: Royal Society of Chemistry journal article supplement (doi:10.1039/d1ra05168g), 2021-01-01
Supplement: d1ra05168g1.pdf [file d1ra05168g1.pdf]

*Supplementary Information*

**Effect of hydrothermal aging temperature on Cu-SSZ-13/H-SAPO-34 composite for the selective catalytic reduction of NO<sub>x</sub> by NH<sub>3</sub>**

*Huawang Zhao <sup>a\*</sup>, Mimi Lin <sup>b</sup>, Yujie Wang <sup>c</sup>, Jiandong Zheng <sup>c</sup>*

*a. Department of Environmental Science & Engineering, College of Chemical Engineering, Huaqiao University, Xiamen, Fujian 361021, China*

*b. Xiamen Power Supply Company, State Grid Fujian Electric Power Co. Ltd., Xiamen, Fujian 361001, China*

*c. School of Materials and Chemical Engineering, Chuzhou University, Chuzhou, Anhui 239000, China*

---

\* Corresponding authors: Email: hwzhao@hqu.edu.cn

Table S1. Calculated areas of the area different divided peaks of the samples

| Samples      | 243 °C <sup>a</sup> | 333 °C <sup>a</sup> | 396 °C <sup>a</sup> | Above 500 °C <sup>a</sup> |
|--------------|---------------------|---------------------|---------------------|---------------------------|
| SSZ-SAPO     | 0.97                | 1.60                |                     | 2.53                      |
| SSZ-SAPO-750 | 1.07                | 0.42                | 2.16                | 1.46                      |
| SSZ-SAPO-800 | 1.85                |                     | 1.45                | 1.86                      |
| SSZ-SAPO-850 | 0.87                |                     | 1.14                | 0.59                      |

a. Obtained from Fig. 7. The peak was deconvoluted by Peakfit, and the values of area only represent the intensity.

The peaks at 243 and 333 °C represent the reduction of  $\text{Cu}(\text{OH})^+$  (also  $\text{Cu}^{2+}$ -new) and  $\text{Cu}^{2+}$ -2Al, respectively. The peak above 500 °C can be attributed to the reduction of  $\text{Cu}^+$  to  $\text{Cu}^0$ . The details of the of the assignment of each reduction peak can be found in the main text (Section 3.3.3). The area values of the peak at 243 and 333 °C, representing the  $\text{Cu}^{2+}$  ions content in each sample, decreased after aging at 750 °C, and increased in the sample aged at 800 °C, and then decreased after aging at 850 °C, consistent with the trend of  $\text{Cu}^{2+}$  ions content changes in EPR results in Fig. 5.

The peak area of  $\text{Cu}^{2+}$  to  $\text{Cu}^+$  in SSZ-SAPO-850 is higher than that of  $\text{Cu}^+$  to  $\text{Cu}^0$ . This can be explained by that some highly stable  $\text{Cu}^+$  ions are reduced at temperatures higher than 900 °C [1].

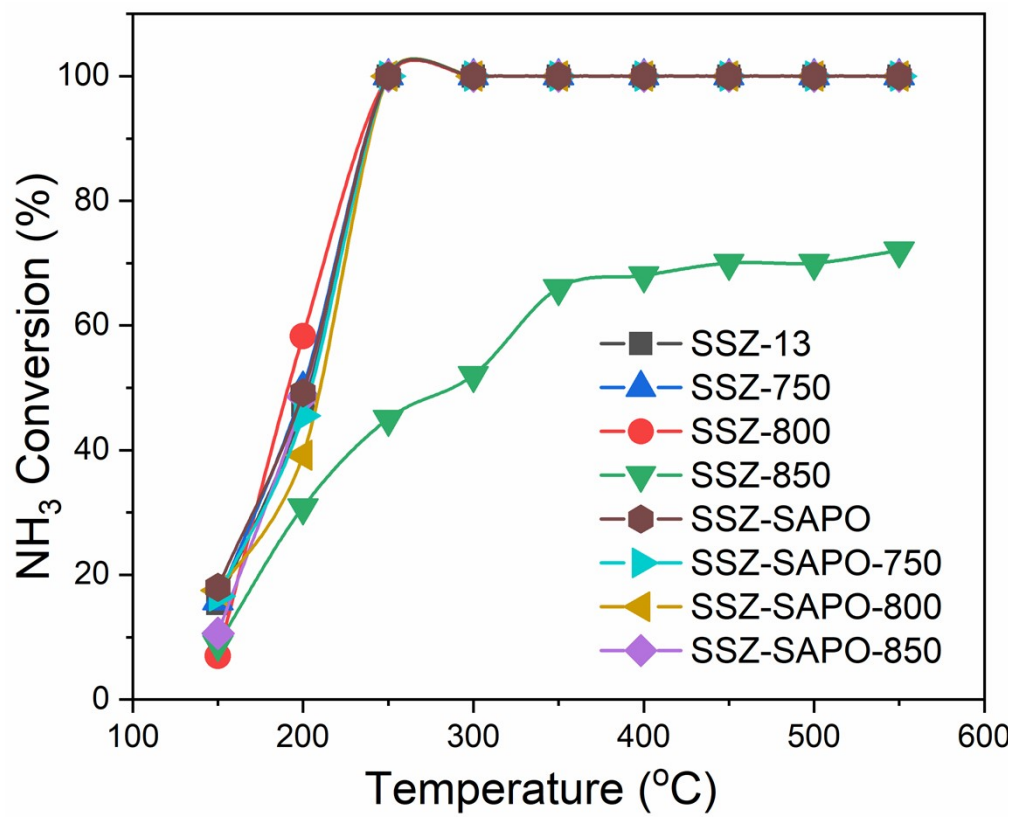

Fig. S1. NH<sub>3</sub> conversion as a function of temperature in NH<sub>3</sub>-SCR reaction.

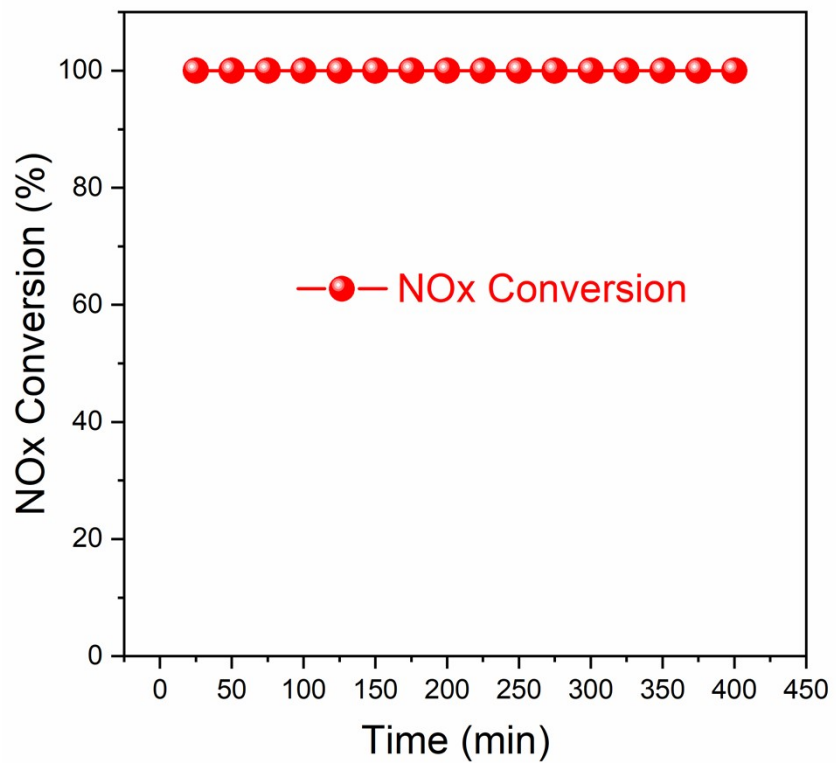

Fig. S2. Long-time NOx conversion of Cu-SSZ-13 at 250 °C.

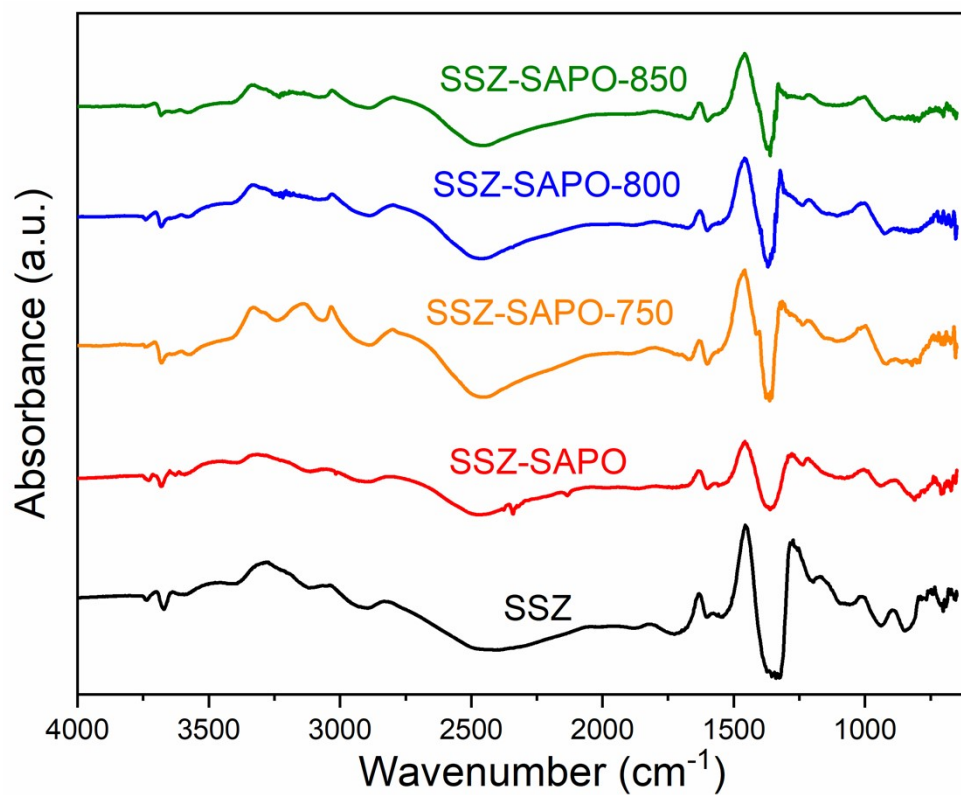

Fig. S3. DRIFTS spectra after NH<sub>3</sub> adsorption on the samples in 4000-500 cm<sup>-1</sup> region. Conditions: 500 ppm NH<sub>3</sub>/N<sub>2</sub> at 25 °C, then N<sub>2</sub> purge before spectra collection.

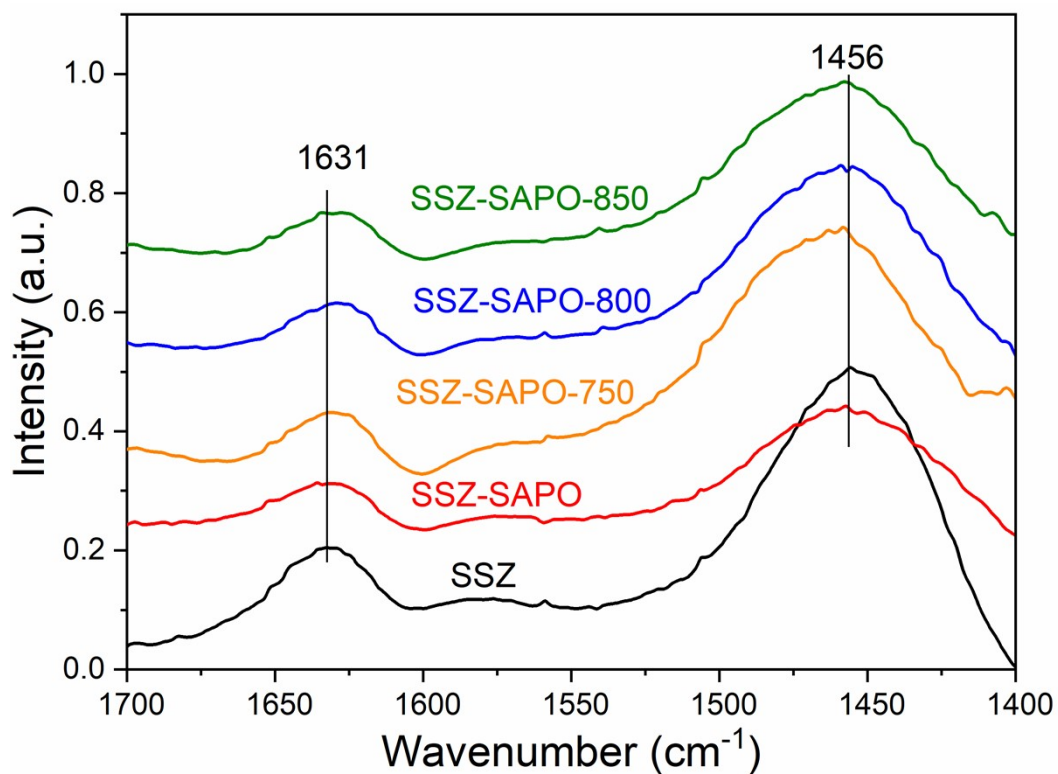

Fig. S4. DRIFTS spectra after  $\text{NH}_3$  adsorption on the samples in 1700-1400  $\text{cm}^{-1}$  region. Condition: 500 ppm  $\text{NH}_3/\text{N}_2$  at 25 °C, then  $\text{N}_2$  purge before spectra collection.

The bands at 1632 and 1475  $\text{cm}^{-1}$  are attributed to molecular  $\text{NH}_3$  absorbed onto exchanged Cu-related Lewis acid sites and  $\text{NH}_4^+$  interacting with Brønsted acid sites (Si-OH-Al), respectively [2]. The aged samples exhibited intense  $\text{NH}_3$  absorption peaks on Lewis acid and Brønsted acid sites, indicating the well-maintained  $\text{Cu}^{2+}$  ions and structure, consistent with the EPR (Fig. 5) and XRD (Fig. 2) results.

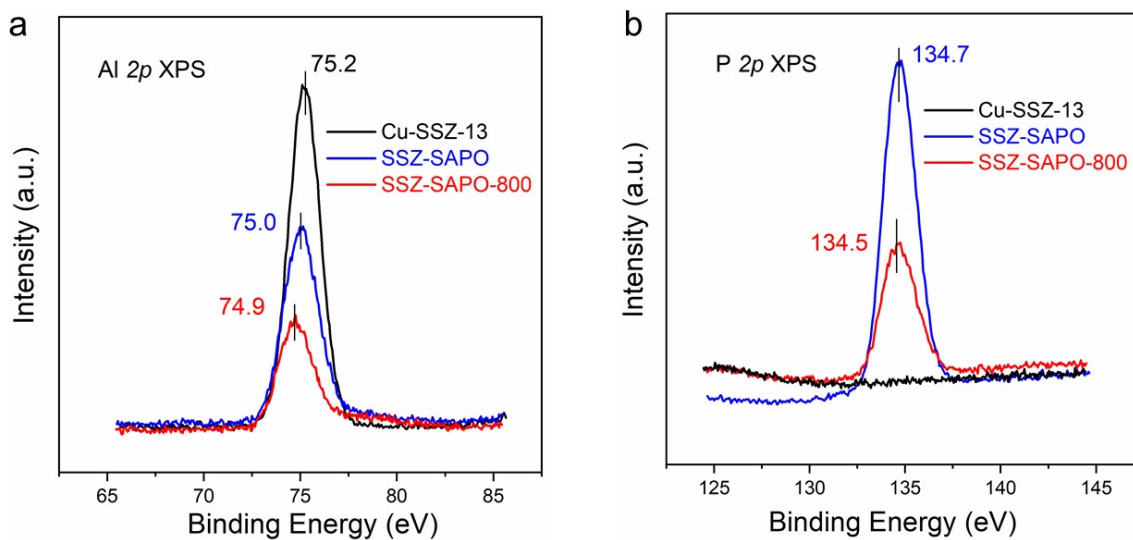

Fig. S5. Al 2p and P 2p XPS spectra of samples

The Cu-SSZ-13 and SSZ-SAPO samples showed the Al 2p XPS peaks at 75.2 and 75.0 eV, respectively. Clearly, the addition of H-SAPO-34 in the composite shifted the Al 2p XPS peak to lower angle, which is probably attributed to the presence of P-Al bond. The SSZ-SAPO-800 sample presented the Al 2p XPS peak at 74.9 eV, lower than that in SSZ-SAPO. This indicates that the Al in SSZ-13 might interact with P upon aging at 800 °C. The P 2p XPS results (Fig. S5b) support this hypothesis, which displayed that the XPS peak in SSZ-SAPO shifted from 134.7 to 13.5 eV after aging at 800 °C.

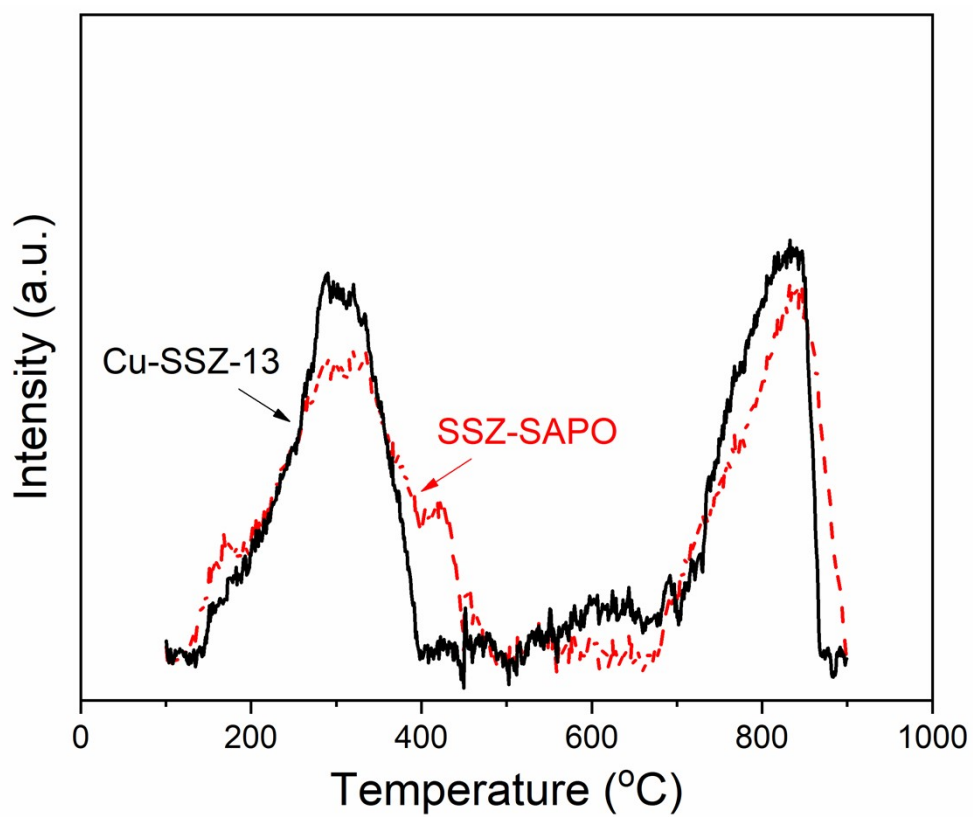

Fig. S6. H<sub>2</sub>-TPR profiles of Cu-SSZ-13 and SSZ-SAPO samples. The curve of SSZ-SAPO was copied from Fig. 7.



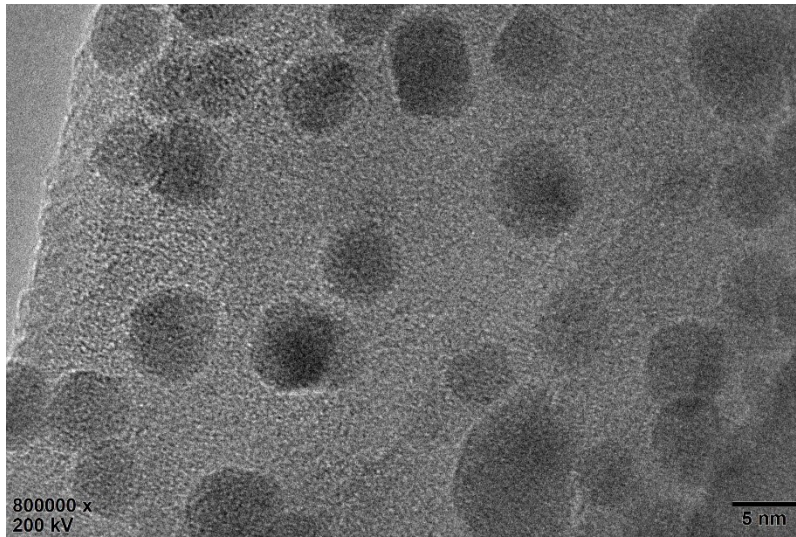

Fig. S7. The TEM image of SSZ-SAPO-750.

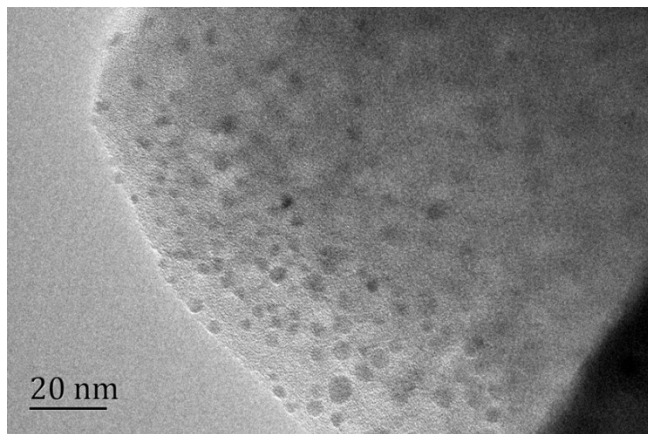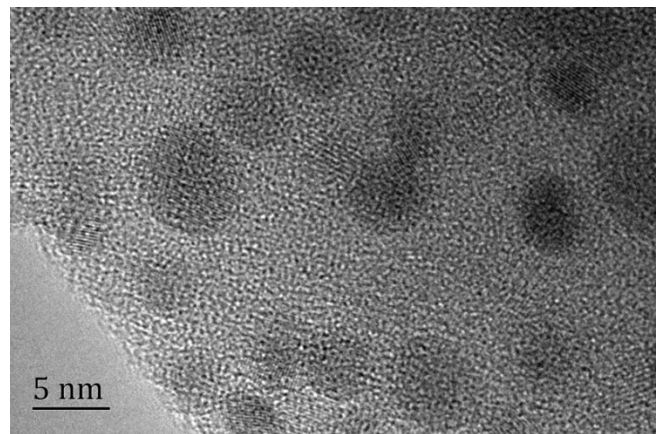

Fig. S8. The TEM image of SSZ-SAPO-850.

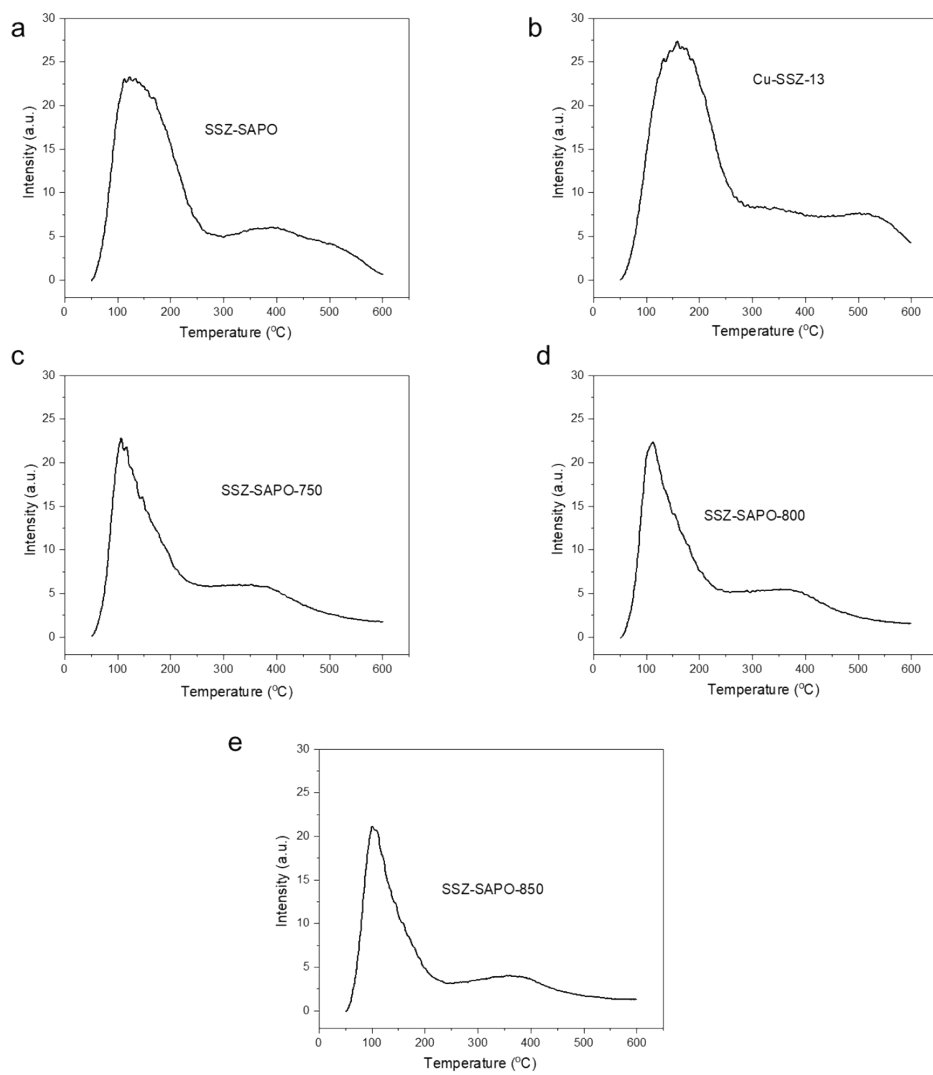

Fig. S9. NH<sub>3</sub>-TPD results of the samples.

After HTA, the NH<sub>3</sub> desorption peak in 400-500 °C decreased in the composite samples, indicating the decrease of Brønsted sites.

## References

- [1] L. Xie, F. Liu, X. Shi, F.-S. Xiao, H. He, *Appl. Catal. B: Environ.* 179 (2015) 206-212.
- [2] Y. Shan, J. Du, Y. Yu, W. Shan, X. Shi, H. He, *Appl. Catal. B: Environ.* 266 (2020) 118655.
